# Supplementary material for: Interaction between ANXA1 and GATA-3 in Immunosuppression of CD4+T Cells
Source: Hindawi journal article supplement (doi:10.1155/2016/1701059), 2016-01-01

# Supplementary Figure 1

Supplementary Figure 1

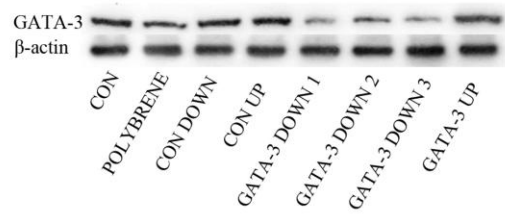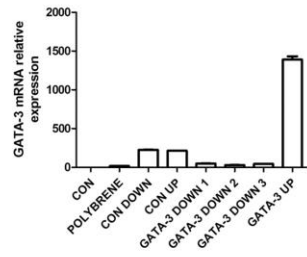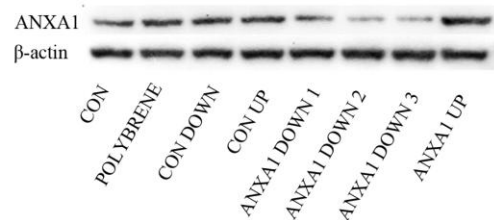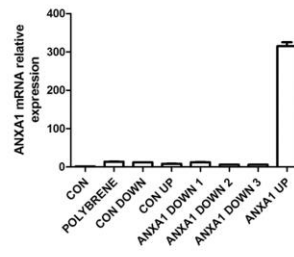

Supplement: f1 [file 1701059.f1.pdf]
